# Supplementary material for: Geographic population structure and distinct intra-population dynamics of globally abundant freshwater bacteria
Source: PubMed Central journal article supplement (PMC11283720; doi:10.1093/ismejo/wrae113), 2024-07-03
Supplement: supplfigs3_anir95_with_and_without_home_wrae113.pdf [file supplfigs3_anir95_with_and_without_home_wrae113.pdf]

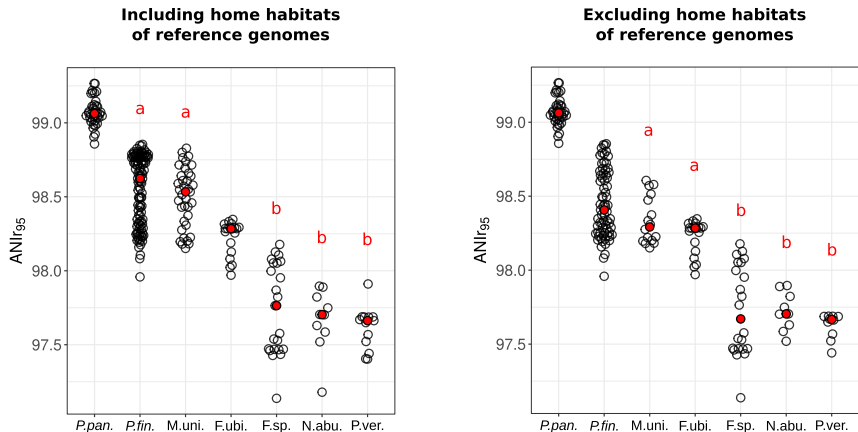

**Suppl. Fig. S3: ANI<sub>r95</sub> values for the seven species when metagenomes sampled from the habitat where the reference genome was obtained from are included (left) and excluded (right).** Each dot refers to one metagenome. Red dots show the medians. Within each plot, pairs that are not significantly different ( $p > 0.05$ ) according to Wilcoxon-Mann-Whitney Rank Sum test are marked with a common letter.
