# Supplementary material for: Geographic population structure and distinct intra-population dynamics of globally abundant freshwater bacteria
Source: PubMed Central journal article supplement (PMC11283720; doi:10.1093/ismejo/wrae113), 2024-07-03
Supplement: supplfigs4_test_hnoncorr_wrae113.pdf [file supplfigs4_test_hnoncorr_wrae113.pdf]

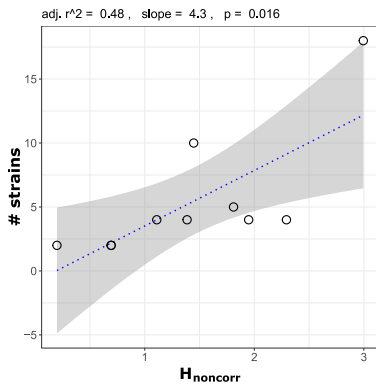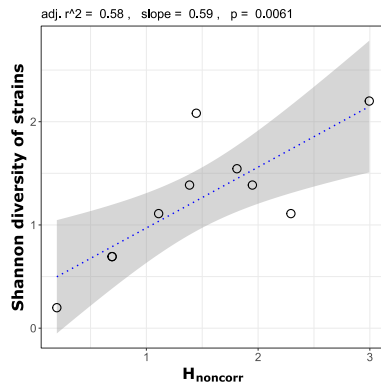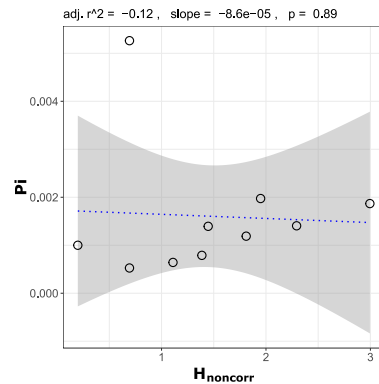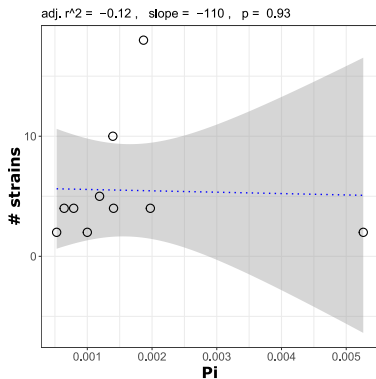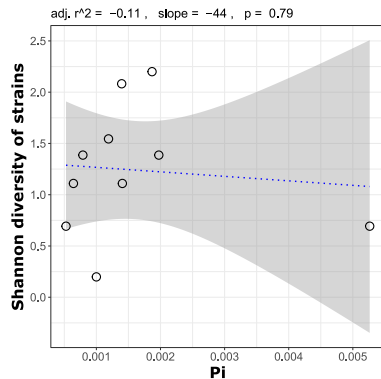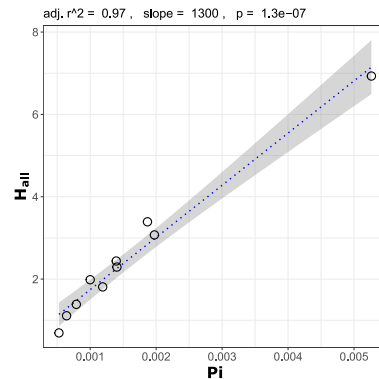

**Suppl. Fig. S4: Comparison of different diversity measures in test dataset.** The Shannon entropy of polymorphic loci with non-correlated allele frequencies ( $H_{\text{noncorr}}$ ) correlates better with the number of strains than Pi. The latter diversity measure is strongly correlated with the Shannon entropy of all polymorphic loci ( $H_{\text{all}}$ ), i.e. it increases with the number of polymorphic loci regardless of correlation among them.
