# Supplementary material for: Geographic population structure and distinct intra-population dynamics of globally abundant freshwater bacteria
Source: ISME J. 2024 Jul 3;18(1):wrae113. doi: 10.1093/ismejo/wrae113 (PMC11283720; doi:10.1093/ismejo/wrae113)
Supplement: SupplFigS5_maps_all_species_and_separate_wrae113 [file supplfigs5_maps_all_species_and_separate_wrae113.pdf]

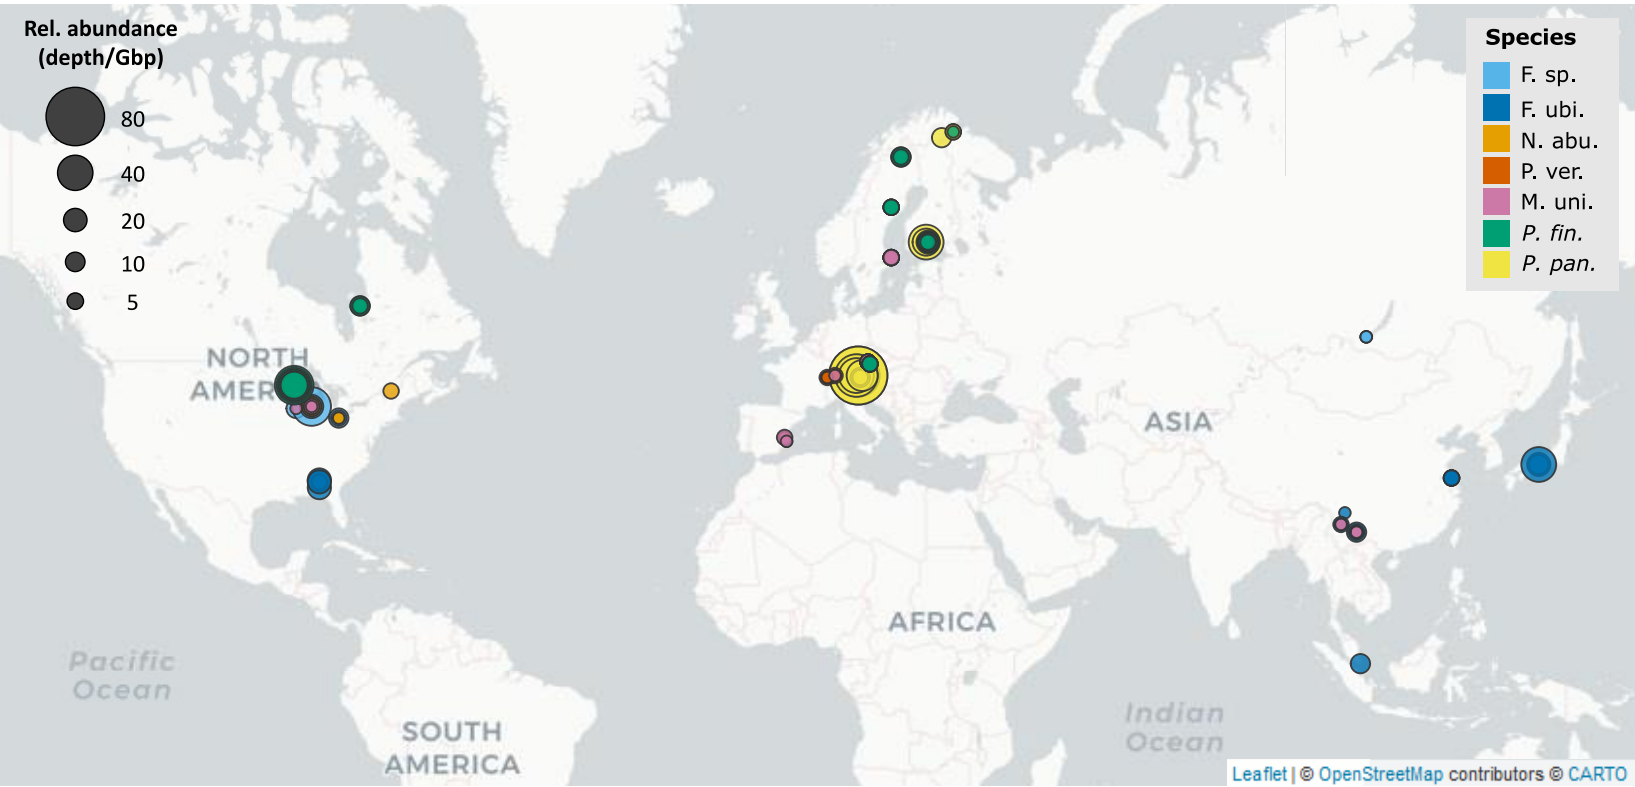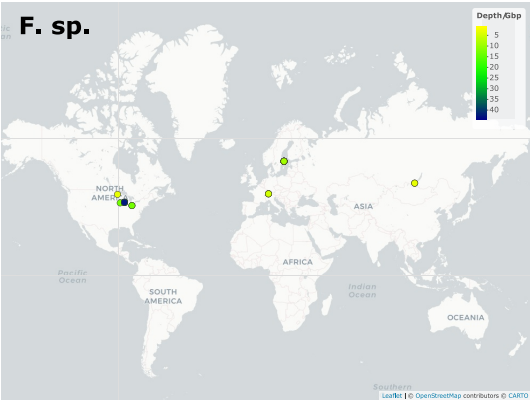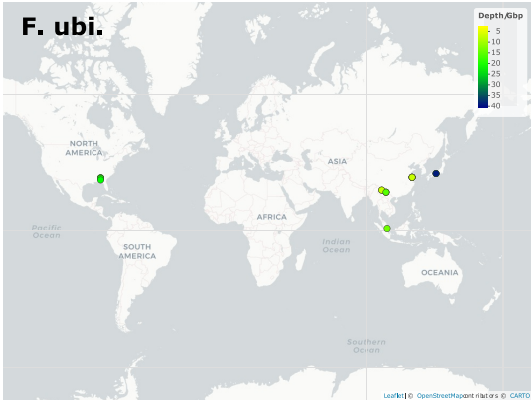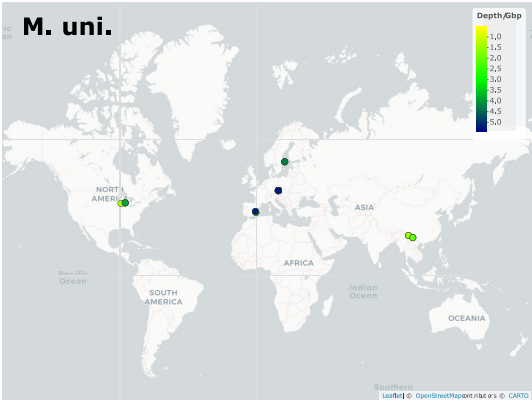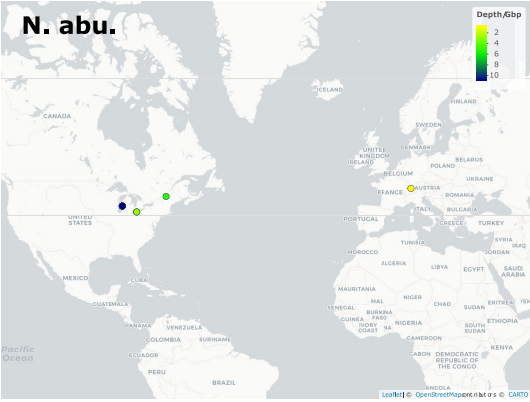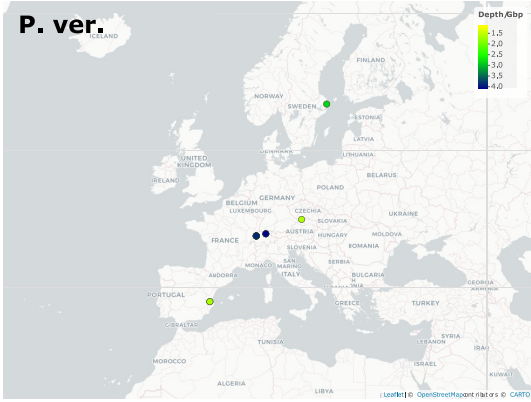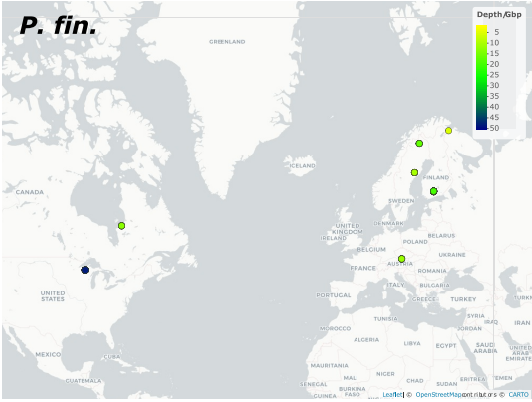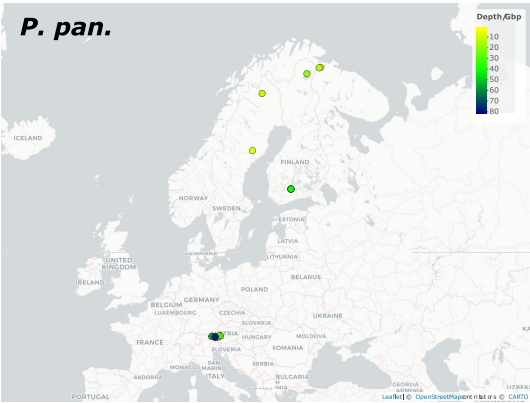

**Suppl. Fig. S5: Coverage depth of the species in the respective metagenomes.** Each dot refers to one metagenome. Relative abundance is given as median coverage depth of the reference genome per Gbp of metagenome (depth/Gbp) as obtained from read mapping. Note that some dots are overlaid by others (multiple metagenomes from the same site). **Large map:** Depth/Gbp (dot size) of all seven species (color-coded) plotted on the same map. **Small maps:** Separate maps for each species, with depth/Gbp in each respective metagenome indicated by dot color.
