# Supplementary material for: Geographic population structure and distinct intra-population dynamics of globally abundant freshwater bacteria
Source: PubMed Central journal article supplement (PMC11283720; doi:10.1093/ismejo/wrae113), 2024-07-03
Supplement: supplfigs6_mapped_bases_wrae113.pdf [file supplfigs6_mapped_bases_wrae113.pdf]

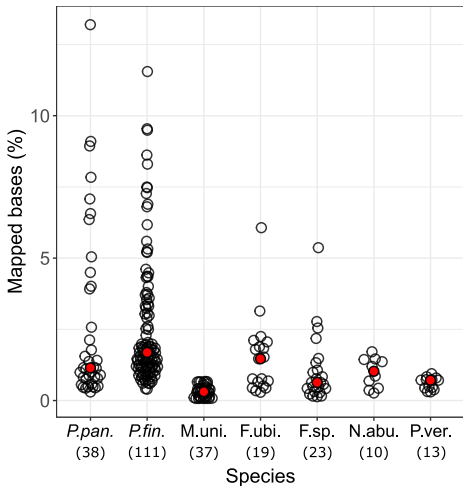

**Suppl. Fig. S6: Percentage of metagenome bases mapped to the reference genomes.** Each dot refers to one metagenome. Median values are shown in red. The number of metagenomes for each species is given in brackets under the x-axis.
