# Supplementary material for: Geographic population structure and distinct intra-population dynamics of globally abundant freshwater bacteria
Source: PubMed Central journal article supplement (PMC11283720; doi:10.1093/ismejo/wrae113), 2024-07-03
Supplement: supplfigs7_linkage_revised_wrae113.pdf [file supplfigs7_linkage_revised_wrae113.pdf]

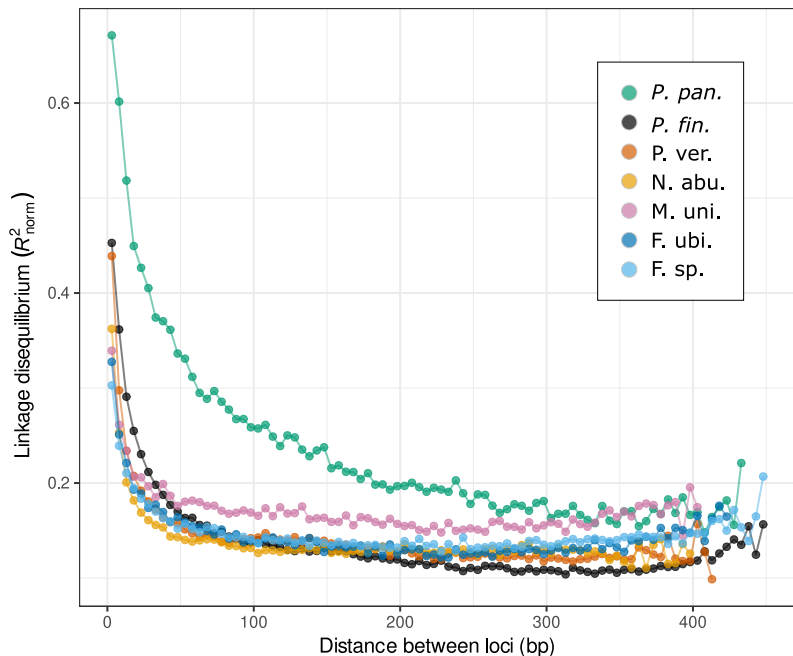

**Suppl. Fig. S7.: Linkage between polymorphic loci.** The normalized correlation coefficient between pairs of loci ( $r^2_{\text{norm}}$ ) was averaged over different pairs with similar distance between the loci, using a 5 bp window. Only windows with at least 20 values were plotted. Higher  $r^2_{\text{norm}}$  values suggest that loci at the given distance were more likely inherited together.
