# Supplementary material for: Geographic population structure and distinct intra-population dynamics of globally abundant freshwater bacteria
Source: PubMed Central journal article supplement (PMC11283720; doi:10.1093/ismejo/wrae113), 2024-07-03
Supplement: supplfigs9_fst_between_depths_wrae113.pdf [file supplfigs9_fst_between_depths_wrae113.pdf]

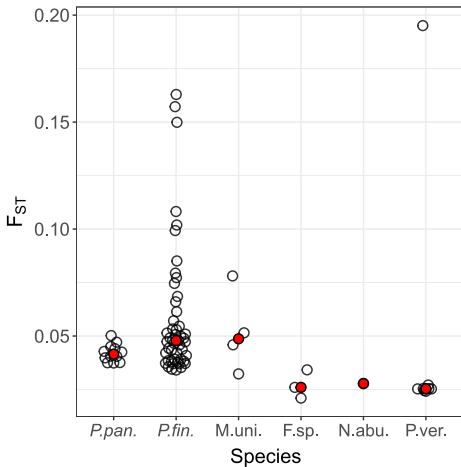

**Suppl. Fig. S9.: Population differentiation within the water column.**  $F_{ST}$  between samples taken from the same habitat at the same time but from different depths. Median values are shown in red.
