# Supplementary material for: Geographic population structure and distinct intra-population dynamics of globally abundant freshwater bacteria
Source: PubMed Central journal article supplement (PMC11283720; doi:10.1093/ismejo/wrae113), 2024-07-03
Supplement: supplfigs12_hclust_group_alleles_wrae113.pdf [file supplfigs12_hclust_group_alleles_wrae113.pdf]

### ***Polynucleobacter paneuropaeus* - Pond EnzMain**

Split into 9 groups based on Point Biserial Correlation cluster quality

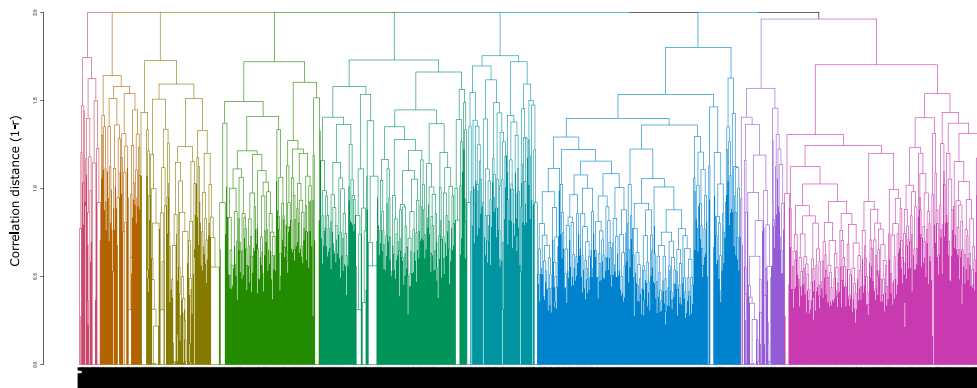

### ***Ca. Fonsibacter* sp. - Lake Erken**

Split into 11 groups based on Point Biserial Correlation cluster quality

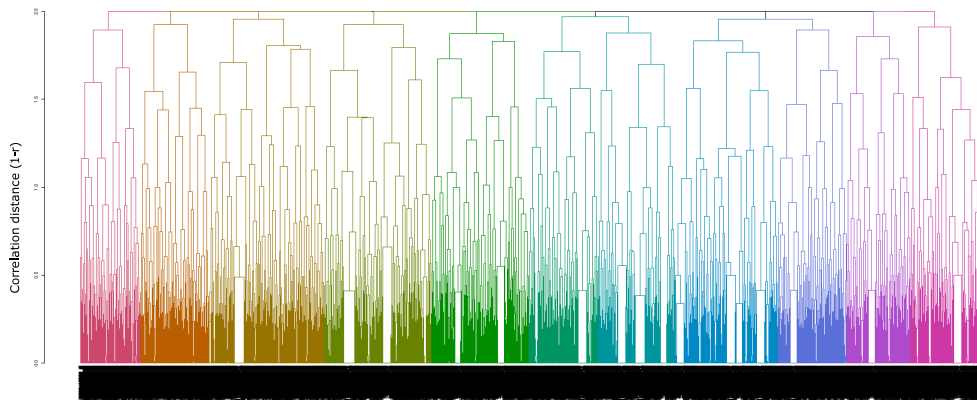

**Suppl. Fig. S12: Hierarchical clustering of alleles based on correlation of allele frequencies across time series of two species in two different habitats.** Alleles of the *Polynucleobacter paneuropaeus* population were clustered into nine and those of the *Ca. Fonsibacter* sp. population into eleven groups based on Point Biserial Correlation cluster quality. It is apparent that the groups in *Polynucleobacter paneuropaeus* are more distinct than those in *Ca. Fonsibacter* sp., pointing at more distinguished genotypes in the former and a more continuous diversity structure in the latter population.
